# Supplementary material
Source: PubMed Central journal article supplement (PMC3302494)
Supplement: supp_86.7.3682_TableS1.pdf [file supp_86.7.3682_TableS1.pdf]

**Supplementary Table 1: Oligonucleotides used for generating HSV1-UL36 mutants.**

| <b>Mutant</b>                                                | <b>forward primer</b>                                                                                | <b>reverse primer</b>                                                                              |
|--------------------------------------------------------------|------------------------------------------------------------------------------------------------------|----------------------------------------------------------------------------------------------------|
| HSV1(17 <sup>+</sup> )blueLox- $\Delta$ UL36                 | GGATAGGGTTCGACGGTTCGAAAC<br>TTAACACACCAAATAATCGAGCGC<br><u>GTAGGACGACGACGACAAGTAA</u>                | CACCGCGACTCGTAGCCTAATCA<br>GGGGAACCGGGGCCATGGTACG<br><u>GGGGCCAGGAACA</u> CTTAACGGCT<br><u>GA</u>  |
| HSV1(17 <sup>+</sup> )blueLox-<br>UL36codon <b>2211</b> stop | TTTCGGCCGGAGGCCCTCCGACCC<br>GGGGCCTCATGTTTCGGCACGCGGC<br><b>TGTAGAGGACGACGACGACAAGT</b><br><u>AA</u> | CAGGGCGCCAGGGGGTCGGTTTC<br>GGACAACCTGCCGCGGCCAGT<br><u>CTGCCAGGAACA</u> CTTAACGGCTG<br><u>A</u>    |
| HSV1(17 <sup>+</sup> )blueLox-<br>UL36codon <b>2430</b> stop | ACGCGTGTCTGGCGGCACAGCTCC<br>CGCGCCTGTCCGCGCTCATCGCCG<br><b>AGTAGAGGACGACGACGACAAGT</b><br><u>AA</u>  | ATGGAGATGTCCACGAGCACCAG<br>ACACGGCGGGCCCCGGGCGAGG<br>GGCCGCAGGAACA <u>CTTAACGGCT</u><br><u>GA</u>  |
| HSV1(17 <sup>+</sup> )blueLox-<br>UL36codon <b>2894</b> stop | GAGGCCCGGTTTTCCCGCCGCCCA<br>CTACACGGCAGCCGGTGGCCACGC<br><b>CCTAGAGGACGACGACGACAAGT</b><br><u>AA</u>  | GCGGACAGGCGGCTGACGGTCA<br>AATGCCCCGGGGGCGCGCAGAT<br>GTGGTCAGGAACA <u>CTTAACGGCT</u><br><u>GA</u>   |
| HSV1(17 <sup>+</sup> )blueLox-<br>UL36codon <b>2998</b> stop | ACGGGCATGTAGCACCCGGGGAG<br>TATCCGGCGGTTCGGTTCCGGGCA<br><b>CCGTAGAGGACGACGACGACAAG</b><br><u>TAA</u>  | GTGCGTGGATTTGTGGAAGACGC<br>GGAAGCCGGGACGGATGGGGCGG<br>TTTTGCAGGAACA <u>CTTAACGGCT</u><br><u>GA</u> |

The underlined sequences of the primers indicate the binding sites for the plasmid pGP704-Kan. The TAG stop codons are indicated in bold.
